# Supplementary material for: Women’s perceptions and self-reports of excessive bleeding during and after delivery: findings from a mixed-methods study in Northern Nigeria
Source: PubMed Central journal article supplement — BMJ Open. 2021 Oct 11;11(10):e047711. doi: 10.1136/bmjopen-2020-047711 (PMC8506868; doi:10.1136/bmjopen-2020-047711), 2021-10-11
Supplement: bmjopen-2020-047711supp002.pdf [file bmjopen-2020-047711supp002.pdf]

## Supplementary file 2: Survey questionnaire

Note: This study was part of a larger project on maternal morbidity within the community in Yola, North-east Nigeria and only questions relevant to this paper's focus have been provided below.

| S/N | Question                                                                                                                                                                                                                                                                                                                                                                             | Response                                                                                                                          |
|-----|--------------------------------------------------------------------------------------------------------------------------------------------------------------------------------------------------------------------------------------------------------------------------------------------------------------------------------------------------------------------------------------|-----------------------------------------------------------------------------------------------------------------------------------|
|     | I would like to ask some questions about the blood you lost <u>within the first 24 hours after your delivery</u> . By within the first 24 hours after delivery, I mean the blood you lost from the time after you delivered and after aspects such as your clean-up in the delivery room or stitching, up to 24 hours later.                                                         |                                                                                                                                   |
| 1.  | Did your palms look pale or white within 24 hours after the delivery?                                                                                                                                                                                                                                                                                                                | Yes<br>No<br>Don't know                                                                                                           |
| 2.  | Did you experience dizziness within the first 24 hours after the delivery?                                                                                                                                                                                                                                                                                                           | Yes<br>No<br>Don't know                                                                                                           |
| 3.  | Were you shivering, that is shaking from feeling cold, within the first 24 hours after the delivery?                                                                                                                                                                                                                                                                                 | Yes<br>No<br>Don't know                                                                                                           |
| 4.  | Did you feel very weak within the first 24 hours after the delivery such that you were unable to get up or walk?                                                                                                                                                                                                                                                                     | Yes<br>No<br>Don't know                                                                                                           |
| 5.  | Did you faint within the first 24 hours after delivery, that is, become unconscious for a brief period?                                                                                                                                                                                                                                                                              | Yes<br>No<br>Don't know                                                                                                           |
| 6.  | I would like to ask some questions about your blood flow within the first 24 hours after your delivery:<br>- Was the blood rushing, for example, like tap water or someone passing urine?<br>- Did the blood trickle/flow down your legs?<br>- Did so many big, thick clots of blood come out frequently?<br>- Did you have to double your pad?<br>- Did you have to triple your pad | Yes / No / Don't know<br><br>Yes / No / Don't know<br>Yes / No / Don't know<br><br>Yes / No / Don't know<br>Yes / No / Don't know |
| 7.  | Did you stain any of the following within the first 24 hours after the delivery?<br>- Your cloth?<br>- The bed?<br>- The floor?                                                                                                                                                                                                                                                      | Yes / No / Don't know<br>Yes / No / Don't know<br>Yes / No / Don't know                                                           |
| 8.  | Did your birth attendant or another maternity staff come back after your delivery to scoop out blood from inside you, that is, did he/she come back after you had been cleaned-up or stitched and then inserted his/her hand into your vagina or massaged your abdomen to expel left-over blood?                                                                                     | Yes<br>No<br>Don't know                                                                                                           |
| 9.  | <i>For hospital deliveries only:</i> Did any maternity staff mention that your blood level had reduced significantly, for example, after testing your PCV?                                                                                                                                                                                                                           | Yes<br>No<br>Don't know                                                                                                           |
| 10. | Did you have to summon/call a maternity staff at some points after the delivery to check you because you were worried about your bleeding?                                                                                                                                                                                                                                           | Yes<br>No<br>Don't know                                                                                                           |
